# Supplementary material for: Comparative evaluation of remineralizing potential of Galla chinensis with nanohydroxyapatite, chicken egg shell and fish scale derived nanohydroxyapatite on early enamel caries- A single-blinded in vitro study
Source: Research Square preprint supplement (doi:10.21203/rs.3.rs-7031614/v1), 2025-07-28
Supplement: Supplementary file 1 [file 215d66793d78be023c86752b.docx]

| **Group** | **Mean ± SD** |
| --- | --- |
| **Demineralized Control** | 95.28 ± 8.61 |
| **CPP-ACPF** | 70.10 ± 5.96 a |
| **GCE nHAp** | 32.34 ± 4.79 |
| **CES nHAp** | 52.10 ± 7.39 |
| **FS nHAp** | 62.54 ± 9.06 a |

*One-way ANOVA; Post hoc Tukey test*;

*Same superscript in lowercase indicates non-significant difference*

*among the groups with p ≤ 0.05 considered as statistically significant.*
