# Supplementary material for: Comparative evaluation of remineralizing potential of Galla chinensis with nanohydroxyapatite, chicken egg shell and fish scale derived nanohydroxyapatite on early enamel caries- A single-blinded in vitro study
Source: Research Square preprint supplement (doi:10.21203/rs.3.rs-7031614/v1), 2025-07-28
Supplement: Supplementary file 2 [file edde30f6887255a1bcc20a44.docx]

| **Group** | **Mean ± SD** |
| --- | --- |
| **Intact Control** | 2.20 ± 0.02 |
| **Demineralized Control** | 1.41 ± 0.09 |
| **CPP ACPF** | 1.61 ± 0.08a |
| **GCE nHAp** | 2.01 ± 0.14 |
| **CES nHAp** | 1.79 ± 0.04 |
| **FS nHAp** | 1.60 ± 0.04 a |

*One-way ANOVA; Post hoc Tukey test*;

*Same superscript in lowercase indicates non-significant difference*

*among the groups with p ≤ 0.05 considered as statistically significant.*
