# Supplementary material for: Comparative evaluation of remineralizing potential of Galla chinensis with nanohydroxyapatite, chicken egg shell and fish scale derived nanohydroxyapatite on early enamel caries- A single-blinded in vitro study
Source: Research Square preprint supplement (doi:10.21203/rs.3.rs-7031614/v1), 2025-07-28
Supplement: Supplementary file 3 [file fd939cd61dbf7f14fd19db39.docx]

| **Group** | **Mean ± SD** |
| --- | --- |
| **CPP-ACPF** | 32.40 ± 2.81a |
| **GCE nHAp** | 45.63 ± 4.04 |
| **CES nHAp** | 36.39 ± 3.94 |
| **FS nHAp** | 30.49 ± 2.70a |

*One-way ANOVA; Post hoc Tukey test*;

*Same superscript in lowercase indicates non-significant difference*

*among the groups with p ≤ 0.05 considered as statistically significant.*
